# Supplementary material for: Aminoguanidine-based bioactive proligand as AIEE probe for anticancer and anticovid studies
Source: Royal Society of Chemistry journal article supplement (doi:10.1039/d4ra00554f), 2024-01-01
Supplement: d4ra00554f1.pdf [file d4ra00554f1.pdf]

**Supplementary Information for**  
**Aminoguanidine-Based Bioactive Proligand as AIEE Probe for Anticancer**  
**and Anticovid Studies**

K. K. Mohammed Hashim<sup>a</sup>, E. Manoj<sup>a\*</sup>

| Sl. No. | Contents                                                                                                                                                     | Page no. |
|---------|--------------------------------------------------------------------------------------------------------------------------------------------------------------|----------|
| 1       | <b>Scheme S1.</b> The two possible isomers of H <sub>5</sub> L in solution (left) and solid (right) phase.                                                   | S3       |
| 2       | <b>Figure S1.</b> <sup>1</sup> H-NMR spectrum of H <sub>5</sub> L in DMSO-d <sub>6</sub> .                                                                   | S3       |
| 3       | <b>Figure S2.</b> <sup>13</sup> C-NMR spectrum of H <sub>5</sub> L.                                                                                          | S4       |
| 4       | <b>Figure S3.</b> MALDI-MS spectrum of H <sub>5</sub> L.                                                                                                     | S4       |
| 5       | <b>Figure S4.</b> Packing diagram of H <sub>5</sub> L showing hydrogen bonding (Blue) and $\pi \cdots \pi$ stacking (Green) interactions along the a-axis.   | S5       |
| 6       | <b>Figure S5.</b> 2D fingerprint plots of H <sub>5</sub> L showing the percentage contacts contributing to the total Hirshfeld surface area of the molecule. | S6       |
| 7       | <b>Figure S6.</b> Experimental (a) and theoretical (b) IR spectra of H <sub>5</sub> L.                                                                       | S6       |
| 8       | <b>Figure S7.</b> Solution state UV-vis spectrum of H <sub>5</sub> L.                                                                                        | S7       |
| 9       | <b>Figure S8.</b> Solid state (a) UV-vis spectrum and (b) band gap energy calculations of H <sub>5</sub> L from Kubelka-Munk plot.                           | S7       |
| 10      | <b>Figure S9.</b> Fluorescence emission intensity plot of H <sub>5</sub> L in DMF/H <sub>2</sub> O binary mixture.                                           | S8       |
| 11      | <b>Figure S10.</b> Molecular electrostatic potential maps of the compound.                                                                                   | S8       |
| 12      | <b>Figure S11.</b> Phase-contrast images of the compound on MCF-7 at different concentrations in $\mu\text{g/mL}$ .                                          | S9       |

\* Corresponding author.

E-mail address: manoj@cusat.ac.in (E. Manoj).

|    |                                                                                                                                                                                                                          |     |
|----|--------------------------------------------------------------------------------------------------------------------------------------------------------------------------------------------------------------------------|-----|
| 13 | <b>Figure S12:</b> Phase-contrast images of the compound on L929 at different concentrations in $\mu\text{g/mL}$ .                                                                                                       | S10 |
| 14 | <b>Figure S13:</b> Cytotoxicity effect of H <sub>5</sub> L on MCF-7 (left) and L929 cell line (right).                                                                                                                   | S10 |
| 15 | <b>Figure S14.</b> 2D representation of the compound with 6Y2F.                                                                                                                                                          | S11 |
| 16 | <b>Figure S15.</b> 2D representation of the compound with 6M0J.                                                                                                                                                          | S11 |
| 17 | <b>Table S1.</b> Selected bond lengths ( $\text{\AA}$ ) and bond angles ( $^\circ$ ) of H <sub>5</sub> L.                                                                                                                | S12 |
| 18 | <b>Table S2.</b> Interaction parameters of the compound H <sub>5</sub> L.                                                                                                                                                | S13 |
| 19 | <b>Table S3.</b> The calculated chemical reactivity parameters for the compound (The energy parameters were calculated by assuming $-E_{\text{HOMO}}$ as ionization energy and $-E_{\text{LUMO}}$ as electron affinity). | S14 |
| 20 | <b>Table S4.</b> Percentage viability of MCF-7 and L929 cells with concentration of the proligand.                                                                                                                       | S14 |

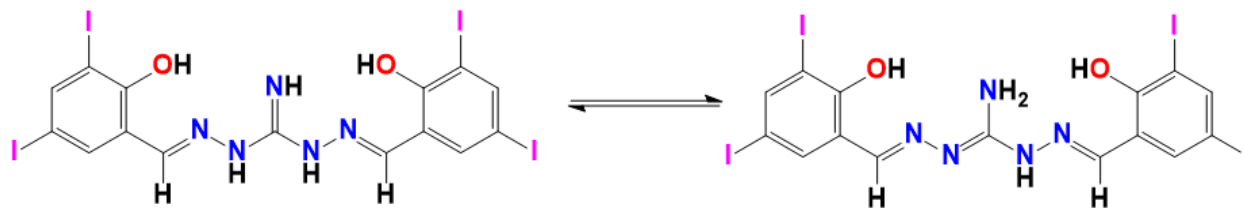

**Scheme S1.** The two possible isomers of H<sub>3</sub>L in solution (left) and solid (right) phase.

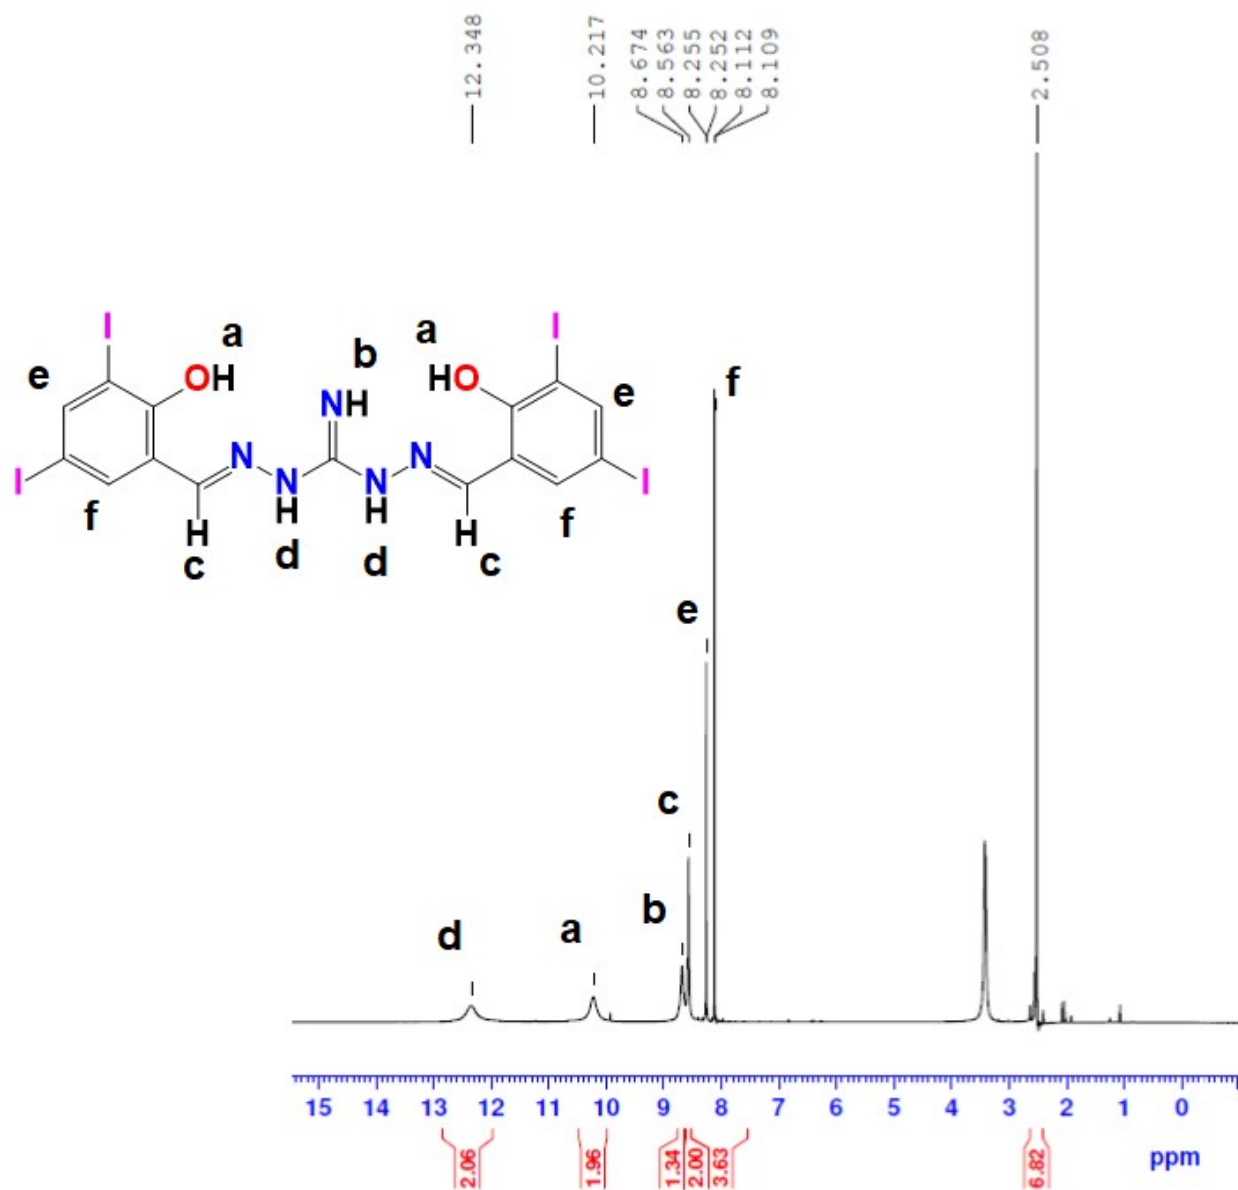

**Figure S1.** <sup>1</sup>H-NMR spectrum of H<sub>3</sub>L in DMSO-d<sub>6</sub>.

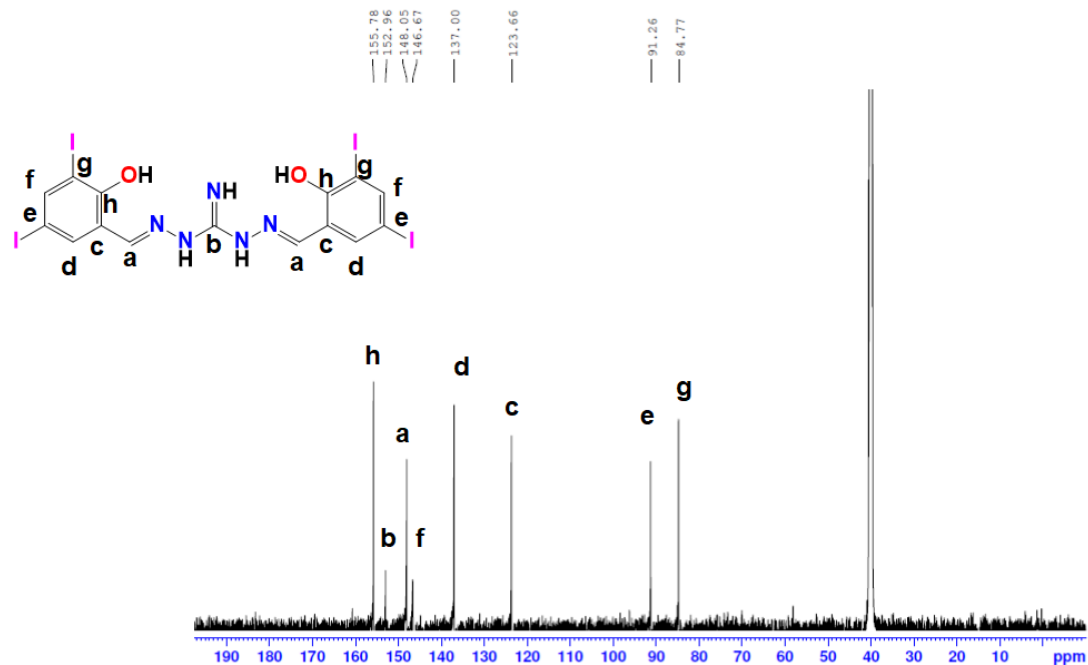

**Figure S2.** <sup>13</sup>C-NMR spectrum of H<sub>5</sub>L.

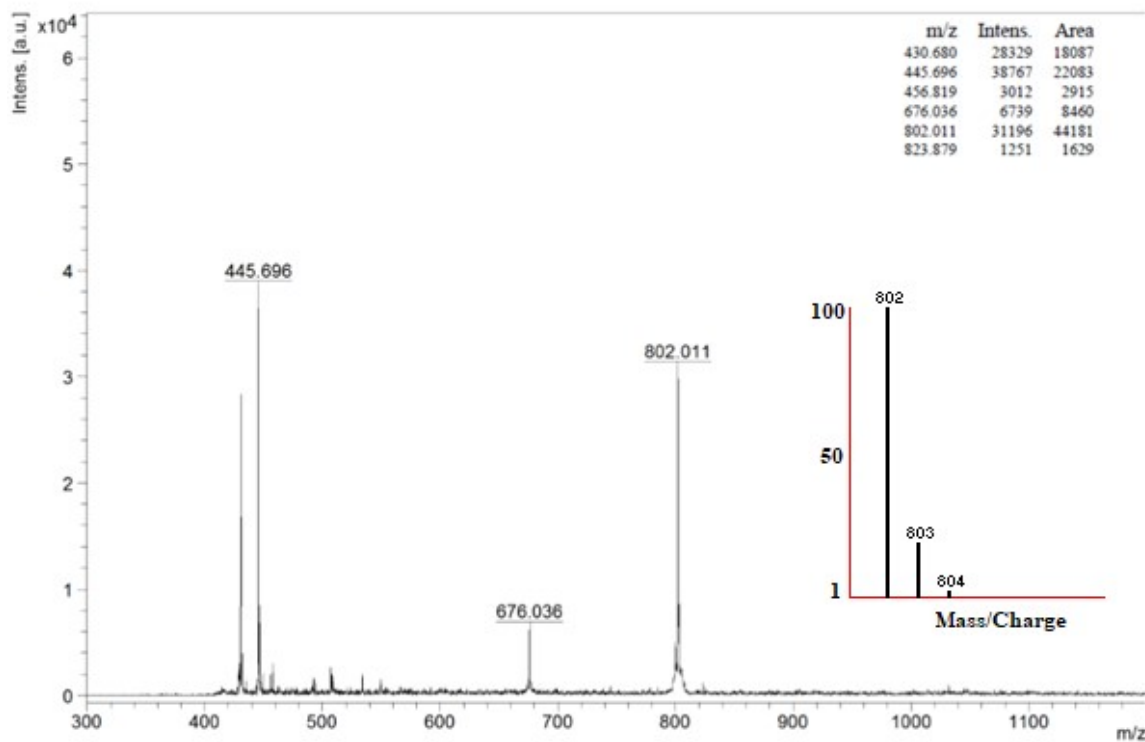

**Figure S3.** MALDI-MS spectrum of H<sub>5</sub>L. The insert showing the calculated isotopic pattern of the molecular ion peak.

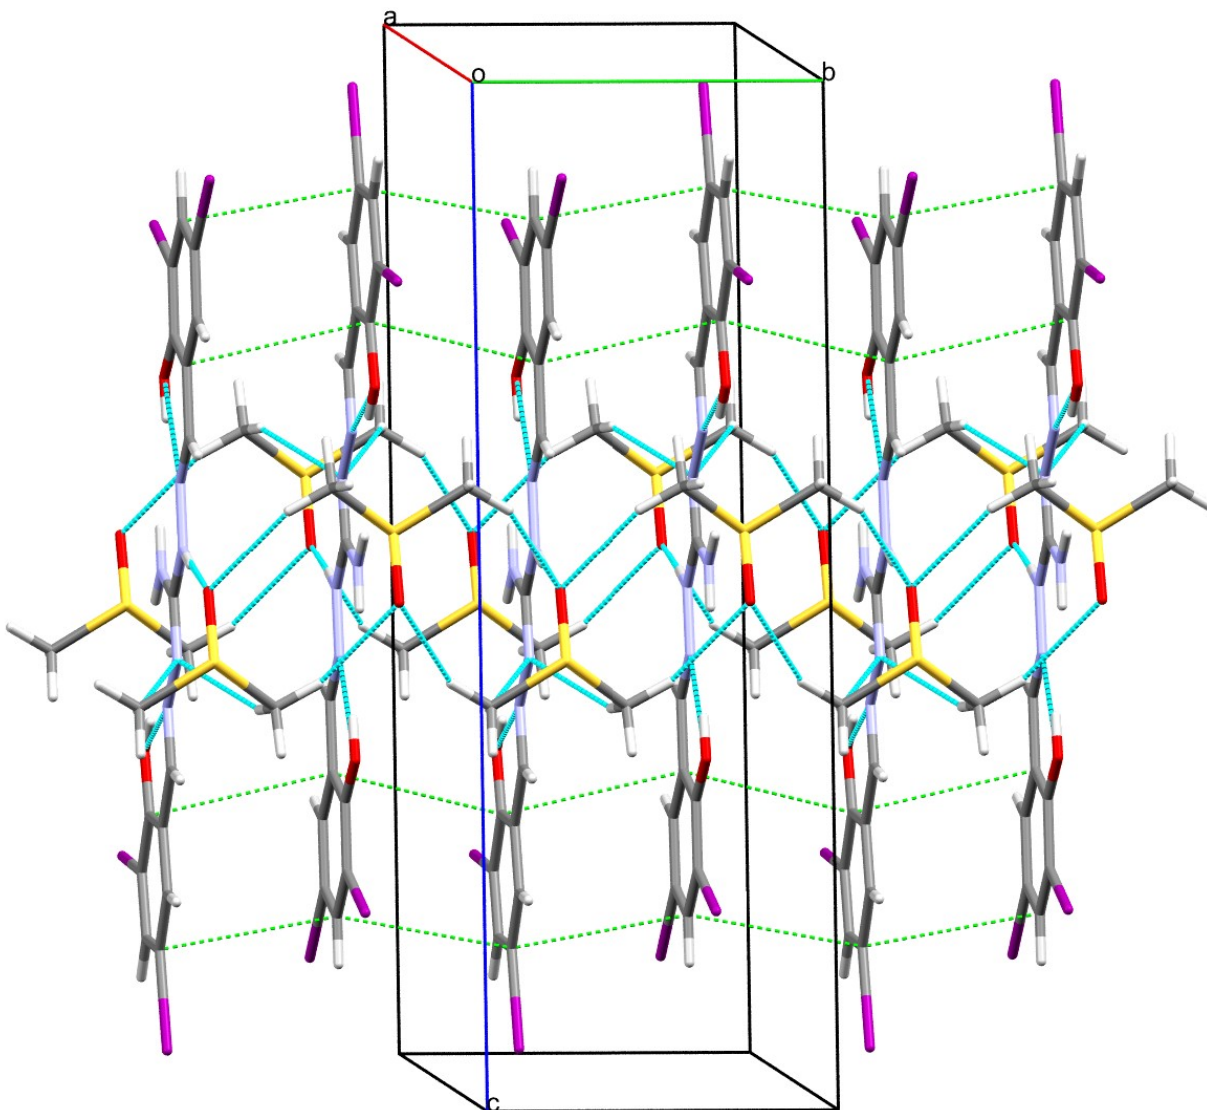

**Figure S4.** Packing diagram of H<sub>5</sub>L showing hydrogen bonding (Blue) and  $\pi$   $\cdots$   $\pi$  stacking (Green) interactions along the a-axis.

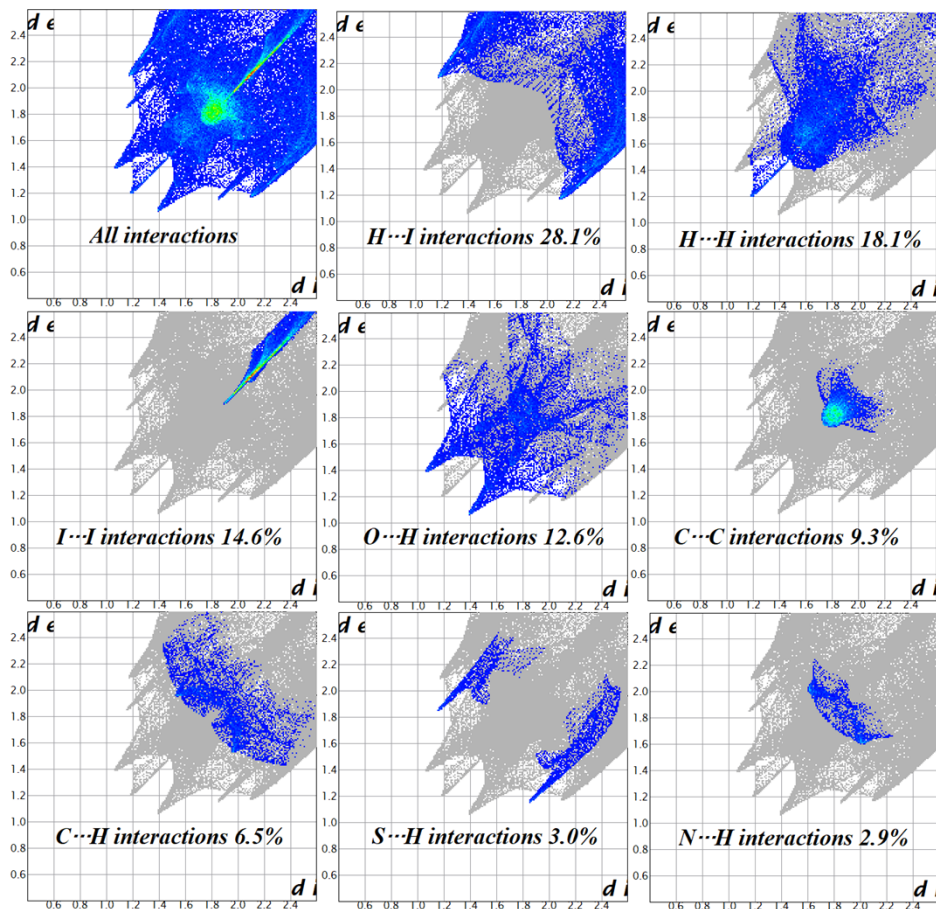

**Figure S5.** 2D fingerprint plots of H<sub>5</sub>L showing the percentage contacts contributing to the total Hirshfeld surface area of the molecule.

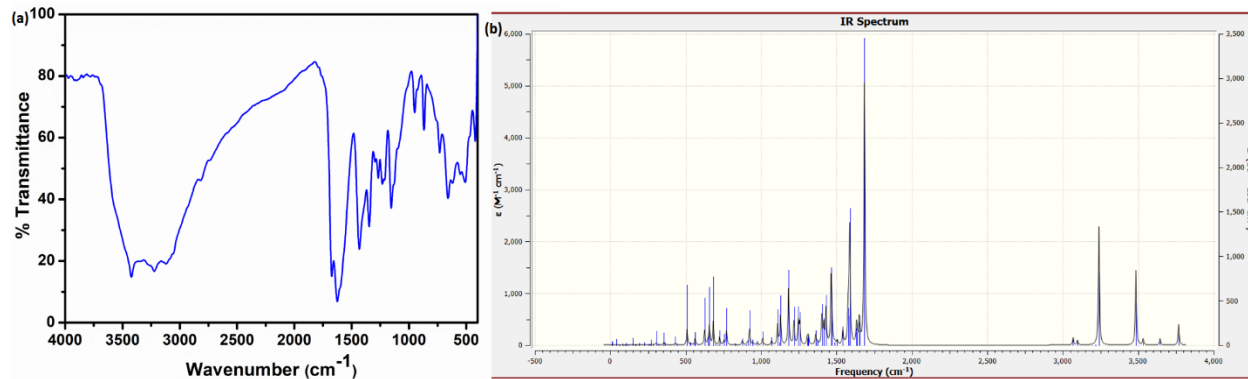

**Figure S6.** Experimental (a) and theoretical (b) IR spectra of H<sub>5</sub>L.

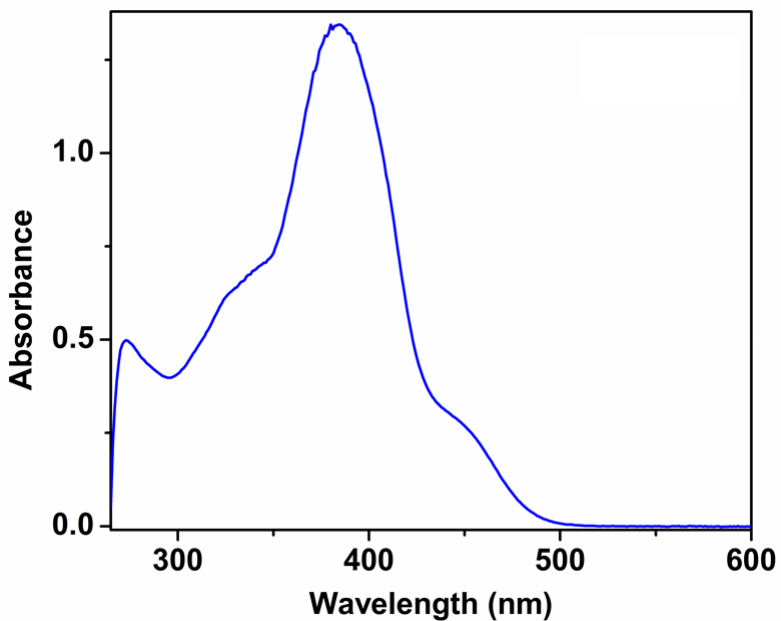

**Figure S7.** Solution state UV-vis spectrum of H<sub>5</sub>L.

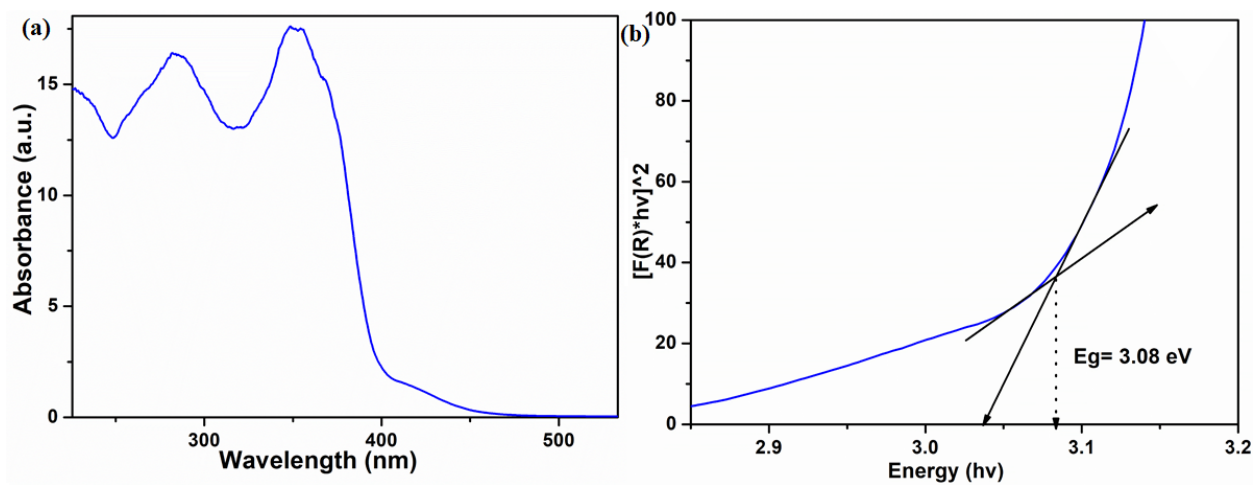

**Figure S8.** Solid state (a) UV-vis spectrum and (b) band gap energy calculations of H<sub>5</sub>L from Kubelka-Munk plot.

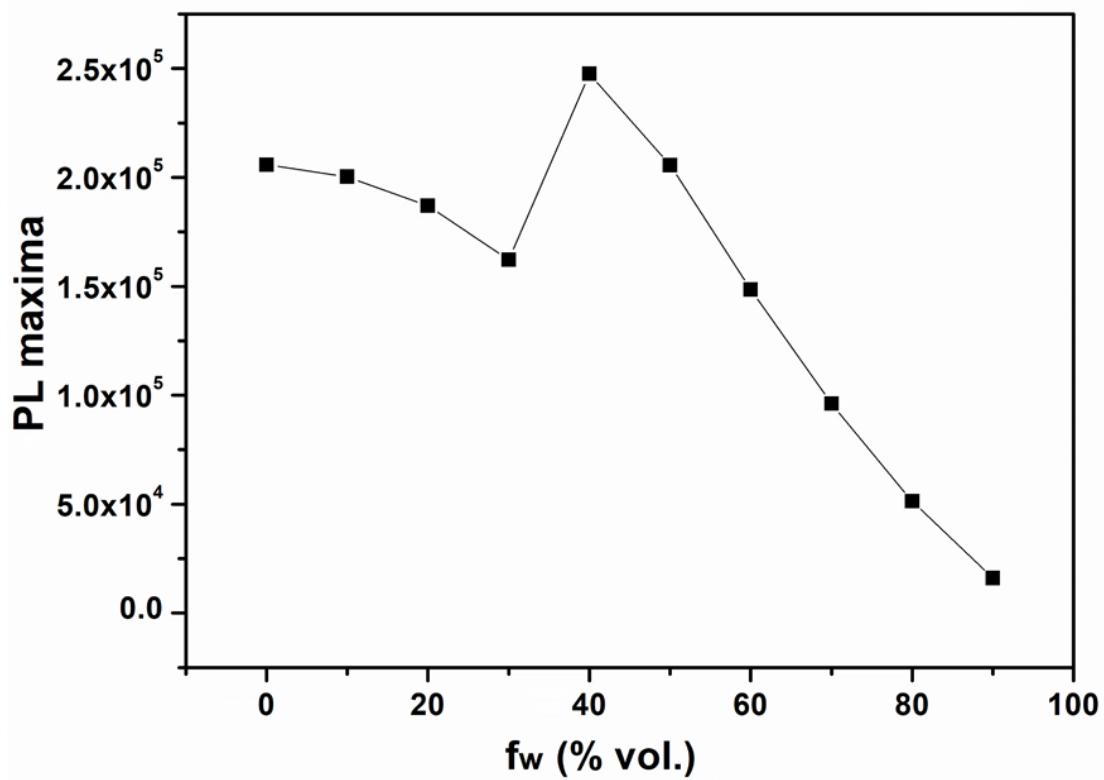

**Figure S9.** Fluorescence emission intensity plot of H<sub>5</sub>L in DMF/H<sub>2</sub>O binary mixture.

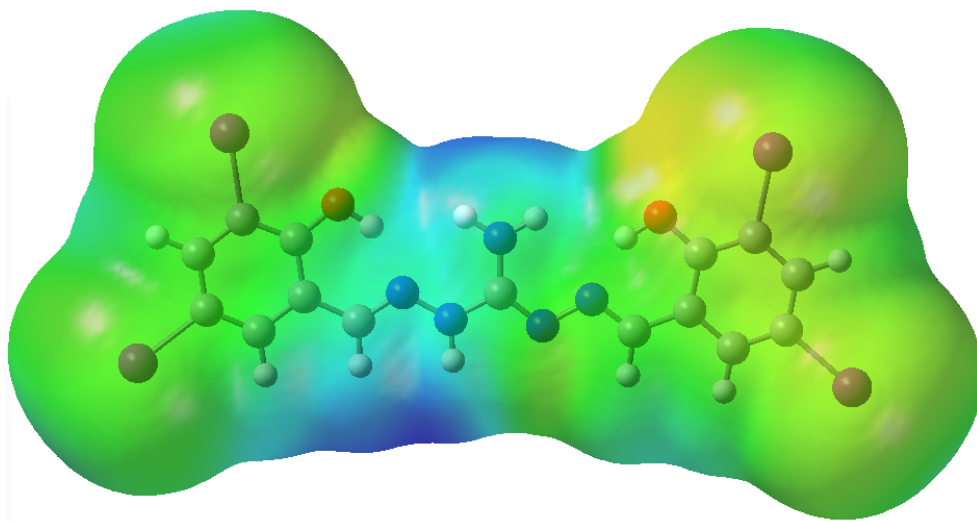

**Figure S10.** Molecular electrostatic potential maps of the compound.



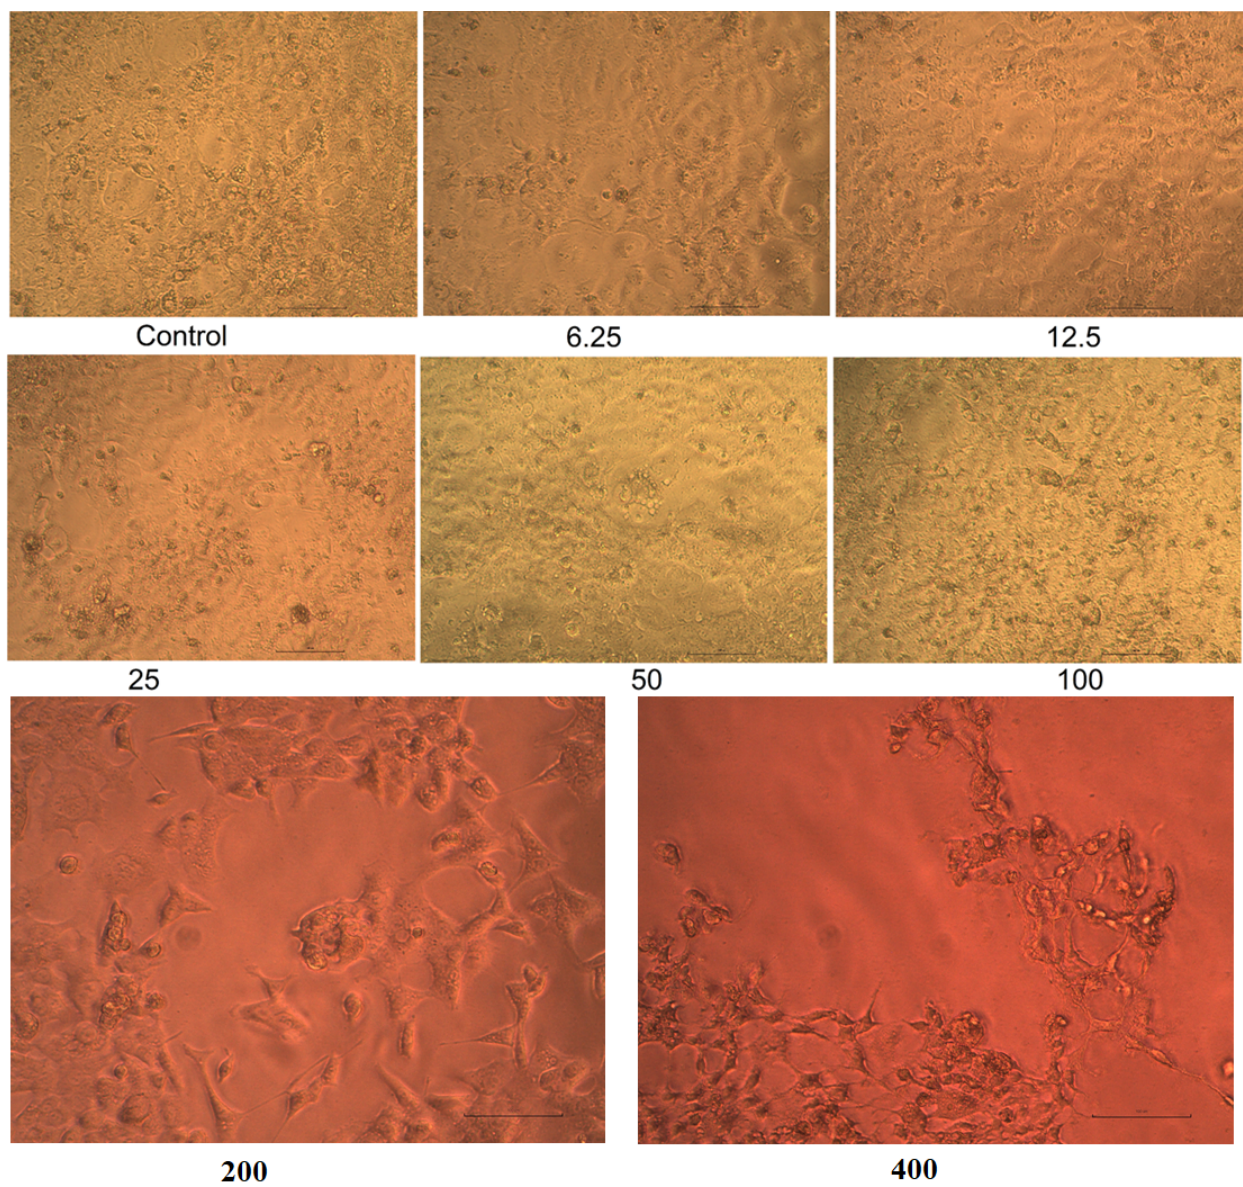

**Figure S11.** Phase-contrast images of the compound on MCF-7 at different concentrations in  $\mu\text{g/mL}$ .

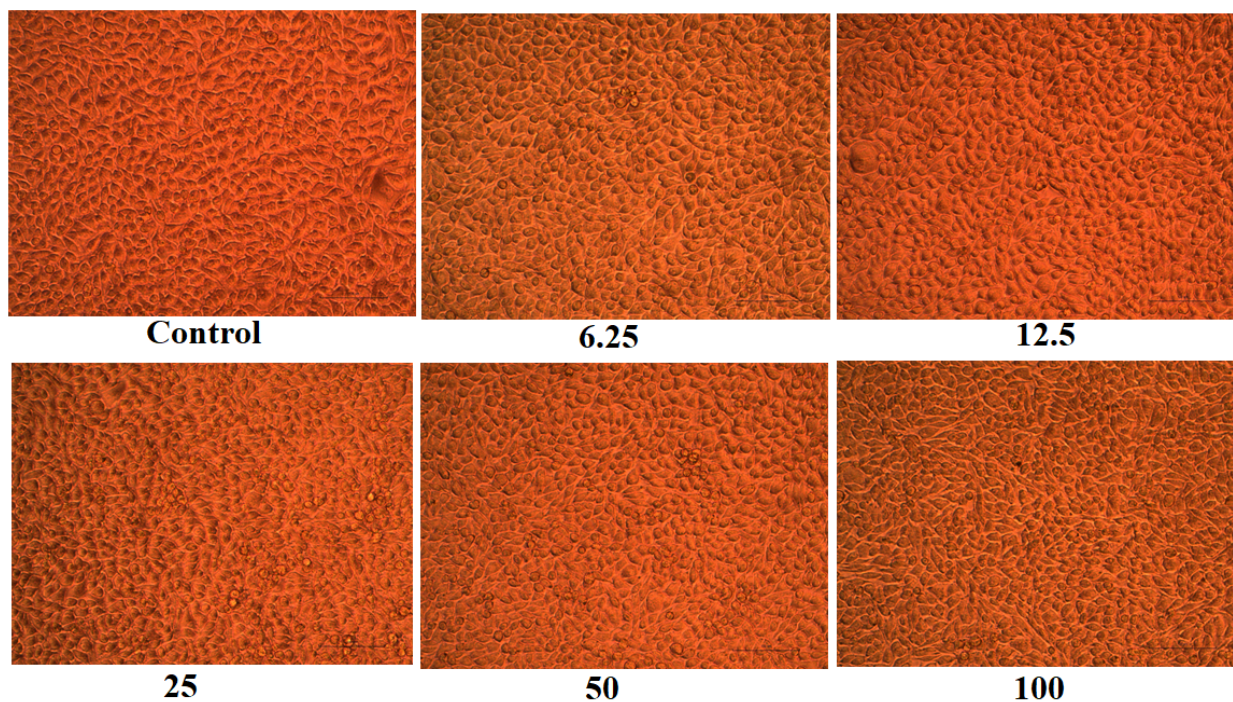

**Figure S12.** Phase-contrast images of the compound on L929 at different concentrations in  $\mu\text{g/mL}$ .

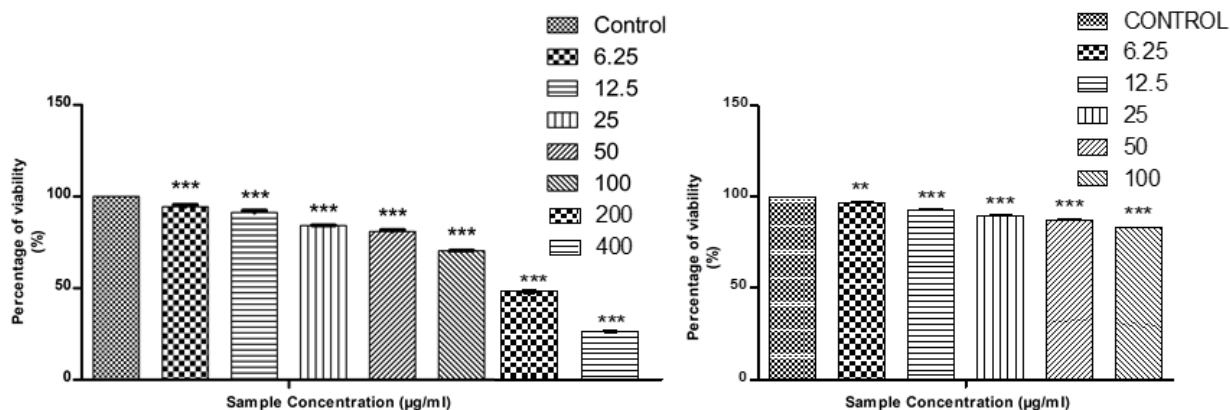

**Figure S13:** Cytotoxicity effect of H<sub>5</sub>L on MCF-7 (left) and L929 cell line (right).



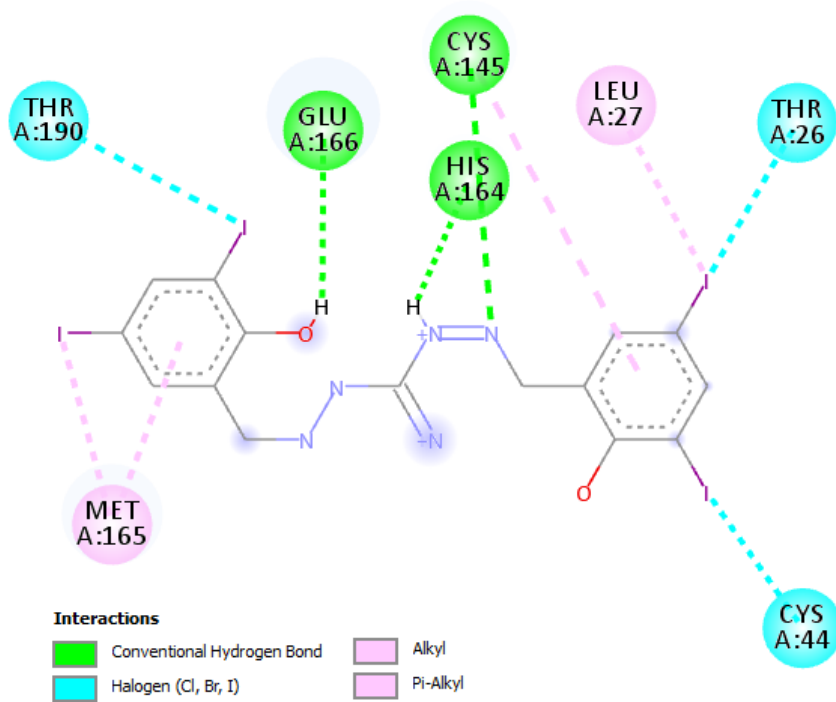

Figure S14. 2D representation of the compound with 6Y2F.

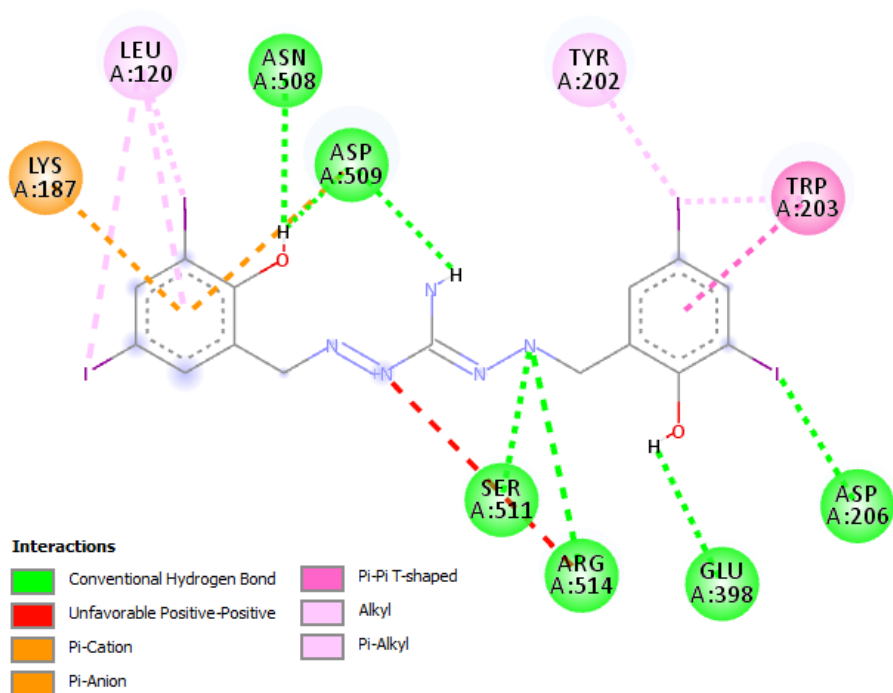

Figure S15. 2D representation of the compound with 6M0J.

**Table S1.** Selected bond lengths (Å) and bond angles (°) of H<sub>5</sub>L.

| SCXRD            |          |                 |          | DFT              |       |                 |        |
|------------------|----------|-----------------|----------|------------------|-------|-----------------|--------|
| Bond lengths (Å) |          | Bond angles (°) |          | Bond lengths (Å) |       | Bond angles (°) |        |
| C7-N1            | 1.291(6) | C7-N1-N2        | 118.5(4) | C7-N1            | 1.291 | C7-N1-N2        | 118.54 |
| C8-N2            | 1.362(6) | C3-C4-I2        | 119.4(3) | C8-N2            | 1.380 | C3-C4-I2        | 119.36 |
| C8-N3            | 1.294(6) | O1-C5-C4        | 118.8(4) | C8-N3            | 1.305 | O1-C5-C4        | 119.61 |
| C8-N5            | 1.331(7) | N1-C7-C6        | 120.6(4) | C8-N5            | 1.348 | N1-C7-C6        | 123.12 |
| C9-N4            | 1.287(5) | C9-N4-N3        | 113.3(4) | C9-N4            | 1.292 | C9-N4-N3        | 114.78 |
| C5-O1            | 1.345(5) | N3-C8-N5        | 126.9(4) | C5-O1            | 1.341 | N3-C8-N5        | 128.13 |
| C15-O2           | 1.361(5) | C8-N2-H2A       | 118(4)   | C15-O2           | 1.337 | C8-N2-H2A       | 115.23 |
| C2-I1            | 2.094(4) | H5B-N5-H5A      | 120      | C2-I1            | 2.135 | H5B-N5-H5A      | 119.91 |
| N1-N2            | 1.352(5) | C3-C2-I1        | 119.0(3) | N1-N2            | 1.347 | C3-C2-I1        | 119.30 |
| N3-N4            | 1.394(5) | C11-C12-I4      | 120.2(3) | N3-N4            | 1.373 | C11-C12-I4      | 120.03 |

**Table S2.** Interaction parameters of the compound H<sub>5</sub>L.

| Hydrogen bonding interactions                                                                                                                                                                 |             |              |             |             |
|-----------------------------------------------------------------------------------------------------------------------------------------------------------------------------------------------|-------------|--------------|-------------|-------------|
| D–H ⋯ A                                                                                                                                                                                       | D–H (Å)     | H ⋯ A (Å)    | D–A (Å)     | D–H ⋯ A (°) |
| C16–H16C ⋯ O3 <sup>a</sup>                                                                                                                                                                    | 0.96        | 2.56         | 3.409(6)    | 147.1       |
| O1–H1A ⋯ N1                                                                                                                                                                                   | 0.82        | 1.88         | 2.607(5)    | 146.7       |
| O2–H2 ⋯ N4                                                                                                                                                                                    | 0.82        | 1.89         | 2.614(5)    | 147.3       |
| N2–H2A ⋯ O3                                                                                                                                                                                   | 0.85(7)     | 1.94(7)      | 2.793(6)    | 174(6)      |
| D = donor, A = acceptor, Equivalent position codes a=-x,-y+1,-z+1                                                                                                                             |             |              |             |             |
| $\pi$ ⋯ $\pi$ interactions                                                                                                                                                                    |             |              |             |             |
| Cg ⋯ Cg                                                                                                                                                                                       | Cg ⋯ Cg (Å) | $\alpha$ (°) | $\beta$ (°) |             |
| Cg(1) ⋯ Cg(2) <sup>b</sup>                                                                                                                                                                    | 3.5684(6)   | 0.000(1)     | 13.95       |             |
| Cg(1) ⋯ Cg(2) <sup>c</sup>                                                                                                                                                                    | 3.5684(6)   | 0.000(1)     | 13.95       |             |
| Cg(1) ⋯ Cg(2) <sup>d</sup>                                                                                                                                                                    | 3.5684(6)   | 0.000(1)     | 13.95       |             |
| Cg(1) ⋯ Cg(2) <sup>e</sup>                                                                                                                                                                    | 3.5684(6)   | 0.000(1)     | 13.95       |             |
| Cg(2) ⋯ Cg(1) <sup>b</sup>                                                                                                                                                                    | 3.5684(6)   | 0.000(1)     | 13.95       |             |
| Cg(2) ⋯ Cg(1) <sup>c</sup>                                                                                                                                                                    | 3.5684(6)   | 0.000(1)     | 13.95       |             |
| Cg(2) ⋯ Cg(1) <sup>d</sup>                                                                                                                                                                    | 3.5684(6)   | 0.000(1)     | 13.95       |             |
| Cg(2) ⋯ Cg(1) <sup>e</sup>                                                                                                                                                                    | 3.5684(6)   | 0.000(1)     | 13.95       |             |
| Equivalent position codes: b= 1-X,-1/2+Y,1-Z, c= 1-X, 1/2+Y,1-Z, d= 1-X, -Y,1-Z, e= 1-X, 1-Y,1-Z, Cg(1)= C(1), C(2), C(3), C(4), C(5), C(6), Cg(2)= C(10), C(11), C(12), C(13), C(14), C(15). |             |              |             |             |
| Iodine bonding interactions                                                                                                                                                                   |             |              |             |             |
| Y ⋯ X                                                                                                                                                                                         |             | Y ⋯ X (Å)    |             |             |
| I1 ⋯ I2                                                                                                                                                                                       |             | 3.9496(6)    |             |             |
| I1 ⋯ I4                                                                                                                                                                                       |             | 3.8049(6)    |             |             |
| I1 ⋯ I3                                                                                                                                                                                       |             | 4.1596(3)    |             |             |
| I1 ⋯ C13                                                                                                                                                                                      |             | 3.7418(18)   |             |             |

**Table S3.** The calculated chemical reactivity parameters for the compound (The energy parameters were calculated by assuming  $-E_{\text{HOMO}}$  as ionization energy and  $-E_{\text{LUMO}}$  as electron affinity).

|                                                    |                  |
|----------------------------------------------------|------------------|
| Energy parameters (eV)                             | H <sub>5</sub> L |
| HOMO                                               | -5.913           |
| HOMO-1                                             | -6.328           |
| LUMO                                               | -2.488           |
| LUMO+1                                             | -1.767           |
| $E_{\text{HOMO}}-E_{\text{LUMO}}: \Delta E$        | 3.425            |
| Total Energy                                       | -28521           |
| Ionization Energy, I                               | 5.913            |
| Electron Affinity, A                               | 2.488            |
| Chemical hardness, $\eta$                          | 1.712            |
| Electronegativity, $\chi$                          | 4.200            |
| Chemical potential, $\mu$                          | -4.200           |
| Electrophilicity, $\omega$                         | 5.151            |
| Global softness, $\sigma$ (eV <sup>-1</sup> )      | 0.291            |
| Nucleophilicity, $\varepsilon$ (eV <sup>-1</sup> ) | 0.194            |
| Dipole moment (Debye)                              | 4.066            |
| Polarizability, $\alpha$ (a.u.)                    | 394.194          |

| H <sub>5</sub> L Concentration ( $\mu\text{g/mL}$ ) | % Viability of MCF-7 cell | % Viability of L929 cell |
|-----------------------------------------------------|---------------------------|--------------------------|
| 6.25                                                | 94.48                     | 96.87                    |
| 12.5                                                | 91.27                     | 92.65                    |
| 25                                                  | 84.17                     | 89.62                    |
| 50                                                  | 80.91                     | 86.93                    |
| 100                                                 | 70.44                     | 83.35                    |
| 200                                                 | 48.19                     | -                        |
| 400                                                 | 26.43                     | -                        |
| IC <sub>50</sub>                                    | 181.05                    | 356.54                   |

**Table S4.** Percent age viability of MCF-7 and L929 cells with concentration

of the proligand.
